# Supplementary material for: Functional diagnostics using fresh uncultured lung tumor cells to guide personalized treatments
Source: PubMed Central journal article supplement — Cell Rep Med. 2021 Aug 17;2(8):100373. doi: 10.1016/j.xcrm.2021.100373 (PMC8385325; doi:10.1016/j.xcrm.2021.100373), 2021-08-17
Supplement: mmc1.pdf [file mmc1.pdf]

**Cell Reports Medicine, Volume 2**

**Supplemental information**

**Functional diagnostics using fresh uncultured  
lung tumor cells to guide personalized treatments**

**Sarang S. Talwelkar, Mikko I. Mäyränpää, Lars Søråas, Swapnil Potdar, Jie Bao, Annabrita Hemmes, Nora Linnavirta, Jon Lømo, Jari Räsänen, Aija Knuuttila, Krister Wennerberg, and Emmy W. Verschuren**

1 **Talwelkar et al.**

2 **Supplemental Information**

3

4 **Table of contents:**

5 **Supplementary Figure Legends**

6 ● **Figure S1.** Analysis of trametinib-induced signaling rewiring

7 ● **Figure S2.** Tumor tissue phenotyping and biochemical analysis of clinical samples

8 ● **Figure S3.** Drug response correlation to identify *KRAS*-mutant selective drug  
9 sensitivities

10 ● **Figure S4.** Analysis of intratumoral genomic and phenotypic heterogeneity in a *KRAS*-  
11 mutant lung cancer specimen

12 ● **Figure S5.** FUTC-based drug profiling identifies patient-selective drug sensitivities

13 ● **Figure S6.** Clinical response to carboplatin plus etoposide treatments

14

15 **Supplementary Table Legends**

16 ● **Table S1.** Clinical information of samples used for FUTC-based drug testing

17 ● **Table S2.** Immunohistochemical and phenotypic characterization of clinical lung  
18 tumor tissues

19 ● **Table S3.** Identification of *KRAS*-selective drug sensitivities

20

21

22

23

24

25 **Supplementary Figures**

**Figure S1**

**A**

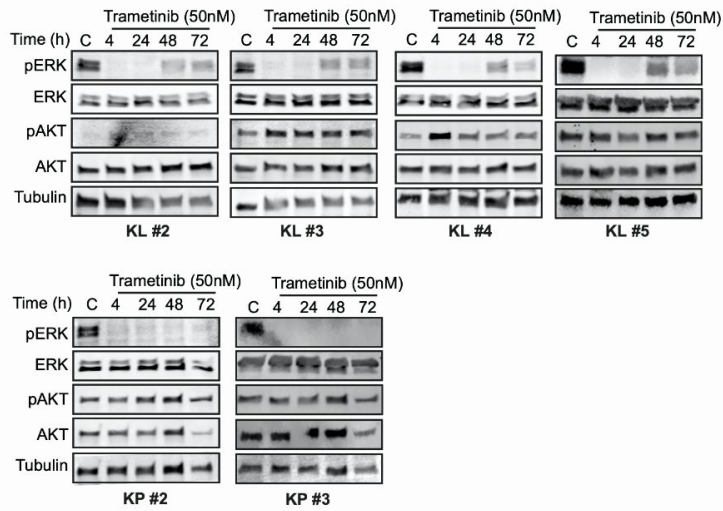

**B**

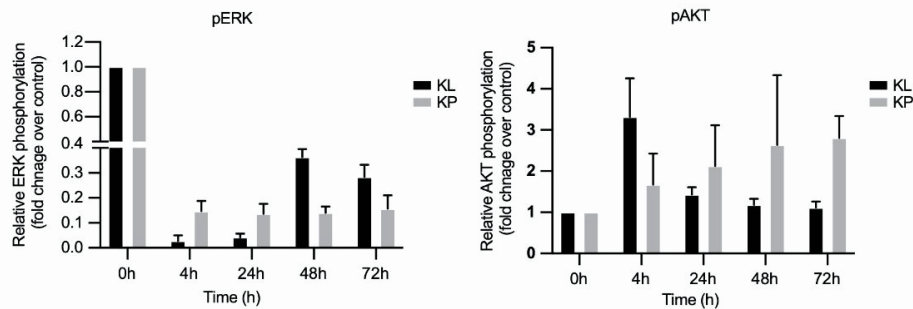

26

27 **Figure S1. Analysis of trametinib-induced signaling rewiring. Related to Figure 2.** (A) Immunoblots of KL  
 28 and KP FUTCs treated with vehicle (C; DMSO) and or treated with 50 nM TR for various time points (4, 24,  
 29 48, and 72 h), and probed with indicated antibodies. (B) Relative quantification of pERK and pAKT signals on  
 30 immunoblots presented in Figure 2D and S1A. Error bars represent ± SEM.

31

32

33

34

35

36

37

**FIGURE S2**

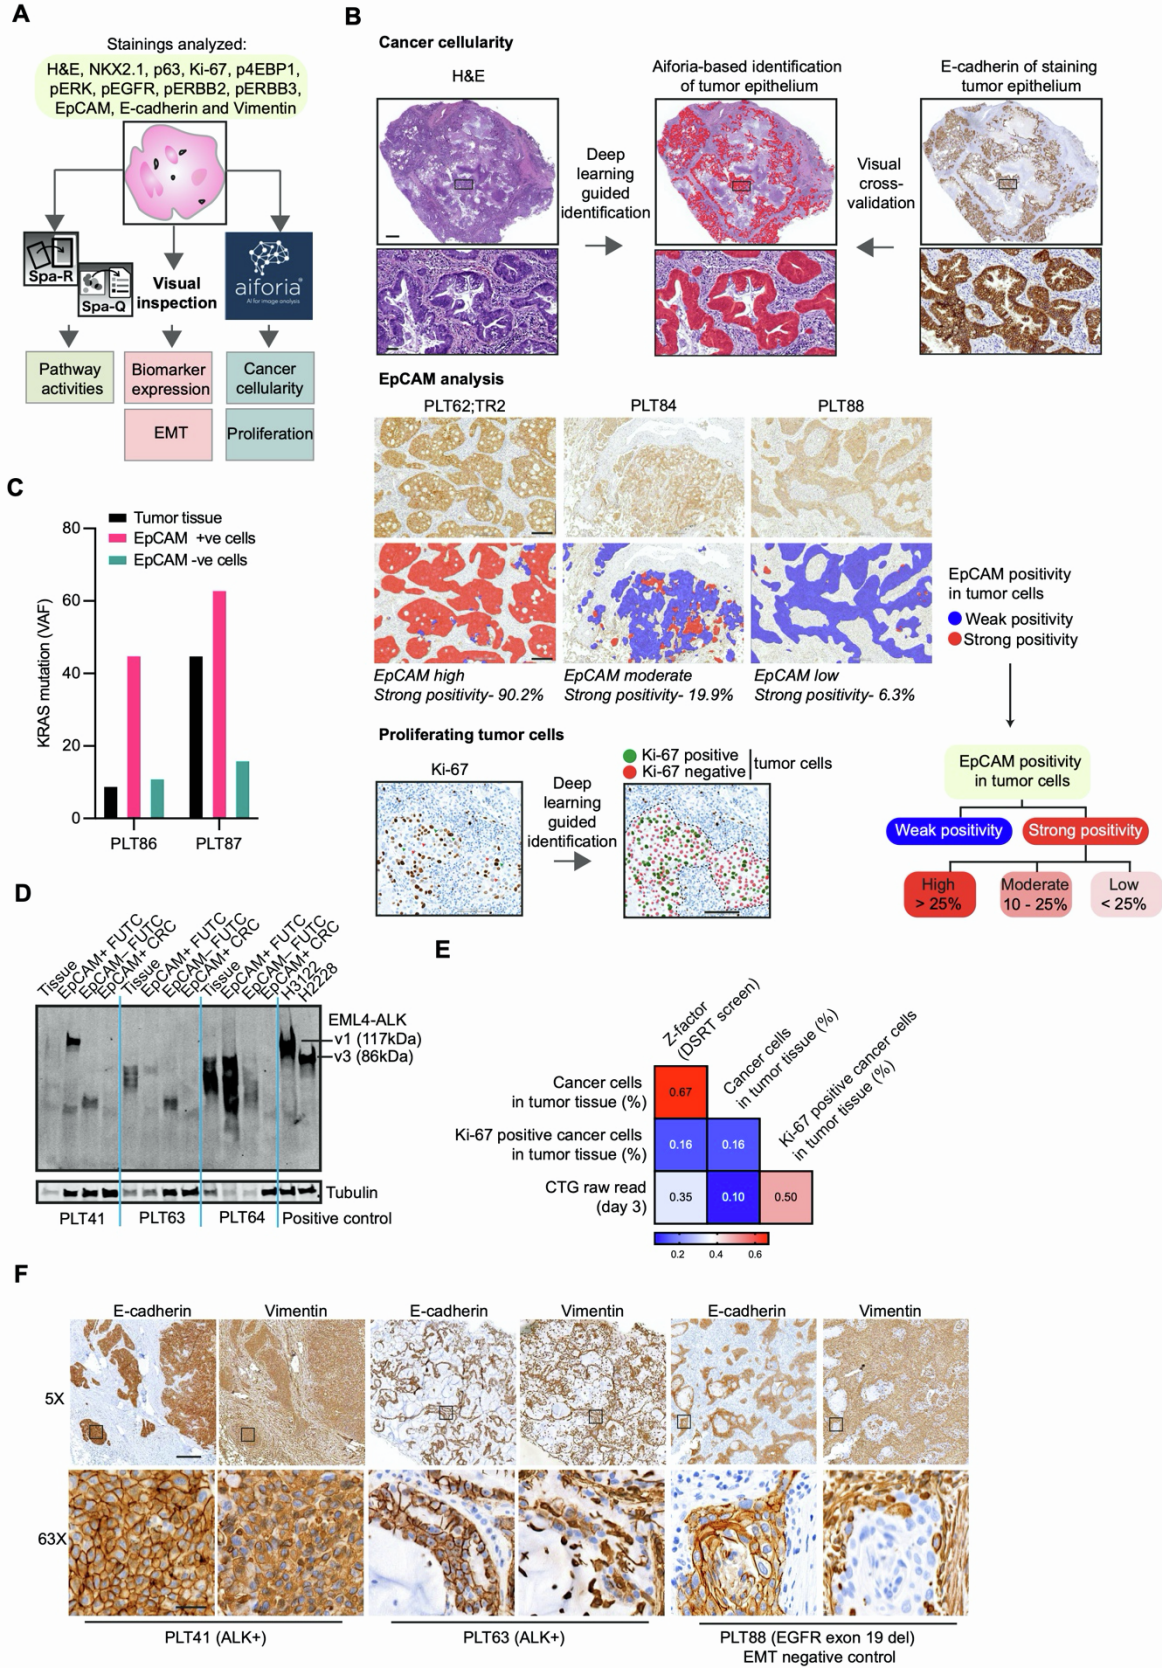

38

39 **Figure S2. Tumor tissue phenotyping and biochemical analysis of clinical samples. Related to Figure 3**  
40 **and 4.** (A) The image analysis software package Spa-RQ<sup>5</sup> was used for quantification of signaling activities in  
41 tumor regions. To identify cancer cellularity, percentage of EpCAM positive cancer cells, and percentages of

42 Ki-67 positive proliferating cancer cells, deep learning-based Aiforia software was used. Biomarker expression  
43 and EMT status was visually assessed for each tumor sample. (B) Top panel: representative images  
44 demonstrating H&E staining (left), tumor epithelium identified using Aiforia (middle), and the validation via  
45 epithelial staining of an adjacent tissue section stained with E-cadherin (right). Scale bars correspond to 1 mm or  
46 50  $\mu\text{m}$  for low or high magnifications, respectively. Middle panel: representative EpCAM stained images and  
47 Aiforia-based detection of tumor cells exhibiting strong (red) and weak (blue) EpCAM positivity. Based on the  
48 percentage of cancer cells exhibiting strong EpCAM positivity, samples were further subclassified into high (>  
49 25%), moderate (10 - 25%), or low (< 10%). Scale bars correspond to 200  $\mu\text{m}$ . Bottom panel: representative Ki-  
50 67 stained images and Aiforia-based detection of Ki-67 positive (green) and negative (red) tumor cells. The  
51 black dotted line indicates the edge of the tumor epithelium region identified by Aiforia in a separate analysis.  
52 Scale bars correspond to 100  $\mu\text{m}$ . (C) KRAS variant allele frequencies in tumor tissue and tumor-derived  
53 EpCAM<sup>+</sup> and EpCAM<sup>-</sup> cells. (D) Immunoblot of EML4-ALK<sup>+</sup> patient samples analyzed to verify the  
54 expression of ALK fusion protein in patient-matched tumor tissue, tumor-derived EpCAM<sup>+</sup> and EpCAM<sup>-</sup> cells,  
55 or CR cultures (passage #4). Samples from H3122 and H2228 cells (EML4-ALK<sup>+</sup> cell lines) were used as  
56 positive controls for v1 (117 kDa) and v3 (86 kDa) variants of EML4-ALK fusion proteins. (E) Heatmap  
57 displaying Pearson correlation coefficient values between various factors associated with FUTC-based drug  
58 testing. (F) Representative IHC images of E-cadherin and vimentin staining in patient-derived EML4-ALK<sup>+</sup>  
59 lung tumor tissues. Scale bars correspond to 200  $\mu\text{m}$  or 20  $\mu\text{m}$  for low or high magnifications, respectively.  
60 Boxes indicate areas depicted at higher magnification in the bottom row.

61

62

63

64

**FIGURE S3**

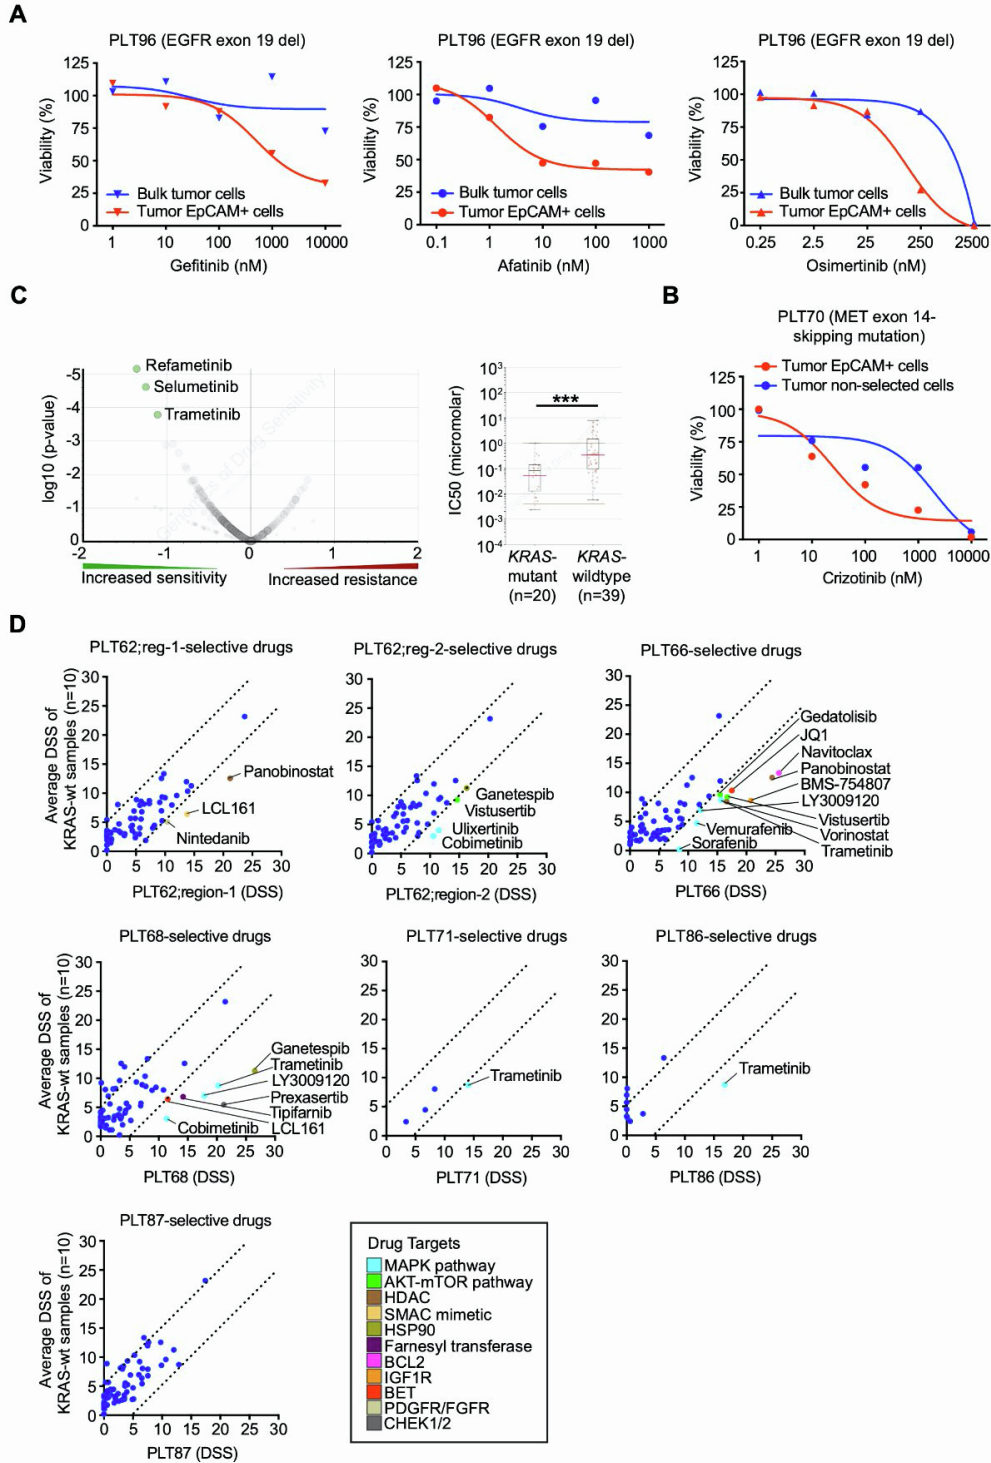

65

66 **Figure S3. Drug response correlation to identify *KRAS* mutant-selective drug sensitivities. Related to**  
 67 **Figure 4 and 5. (A) Dose-response curves of gefitinib, osimertinib, and afatinib in patient-matched tumor-**  
 68 **derived bulk cells and EpCAM+ cells. (B) Dose-response curves of crizotinib in patient-matched tumor-derived**  
 69 **bulk cells and EpCAM+ cells. (C) A volcano plot (left) and box plot (right) representation adapted from**  
 70 **Genomics of Drug Sensitivity in Cancer (GDSC1) database, showing association between MEK inhibitor**  
 71 **sensitivity and *KRAS* mutation in lung adenocarcinoma cells. (D) Identification of patient-selective drug**  
 72 **vulnerabilities by comparison of DSSs of individual *KRAS* mutant samples to average DSSs of *KRAS* wildtype**  
 73 **samples (n=10). Drugs showing *KRAS* mutant sample-selective drug sensitivities (DSS difference >5) are color**  
 74 **coded based on their target.**

75

**FIGURE S4**

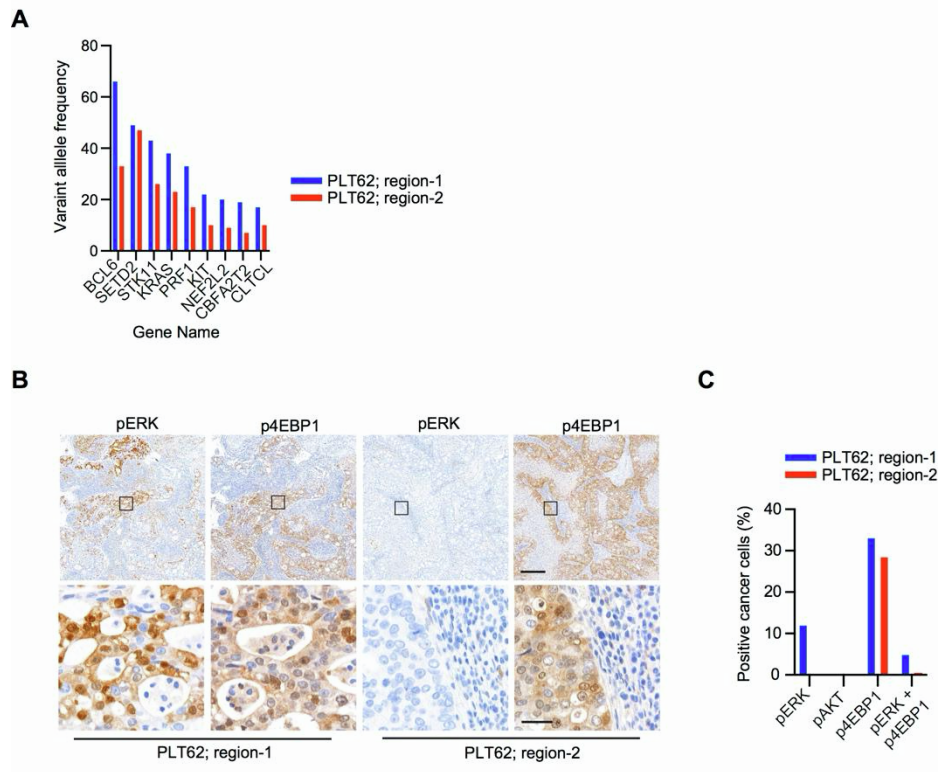

76

77 **Figure S4. Analysis of intratumoral genomic and phenotypic heterogeneity in a *KRAS* mutant lung cancer**  
 78 **specimens. Related to Figure 5.** (A) Bar graph displaying the variant allele frequencies of mutations  
 79 normalized to percentages of cancer cells in their respective tumor region. (B) Representative IHC images of  
 80 pERK, pAKT, p4EBP1 IHC staining in different regions of the PLT62 tissue sample. Scale bars correspond to  
 81 200  $\mu$ m or 20  $\mu$ m for low or high magnifications, respectively. (C) Bar graph displaying levels of pERK  
 82 (Thr202/Tyr204), pAKT (Ser473), p4EBP1 (Thr37/46) and overlapping phosphorylation of ERK and 4EBP1  
 83 levels in cancer cells quantified using the IHC image registration and quantification tool, Spa-RQ.

84

85

86

87

**FIGURE S5**

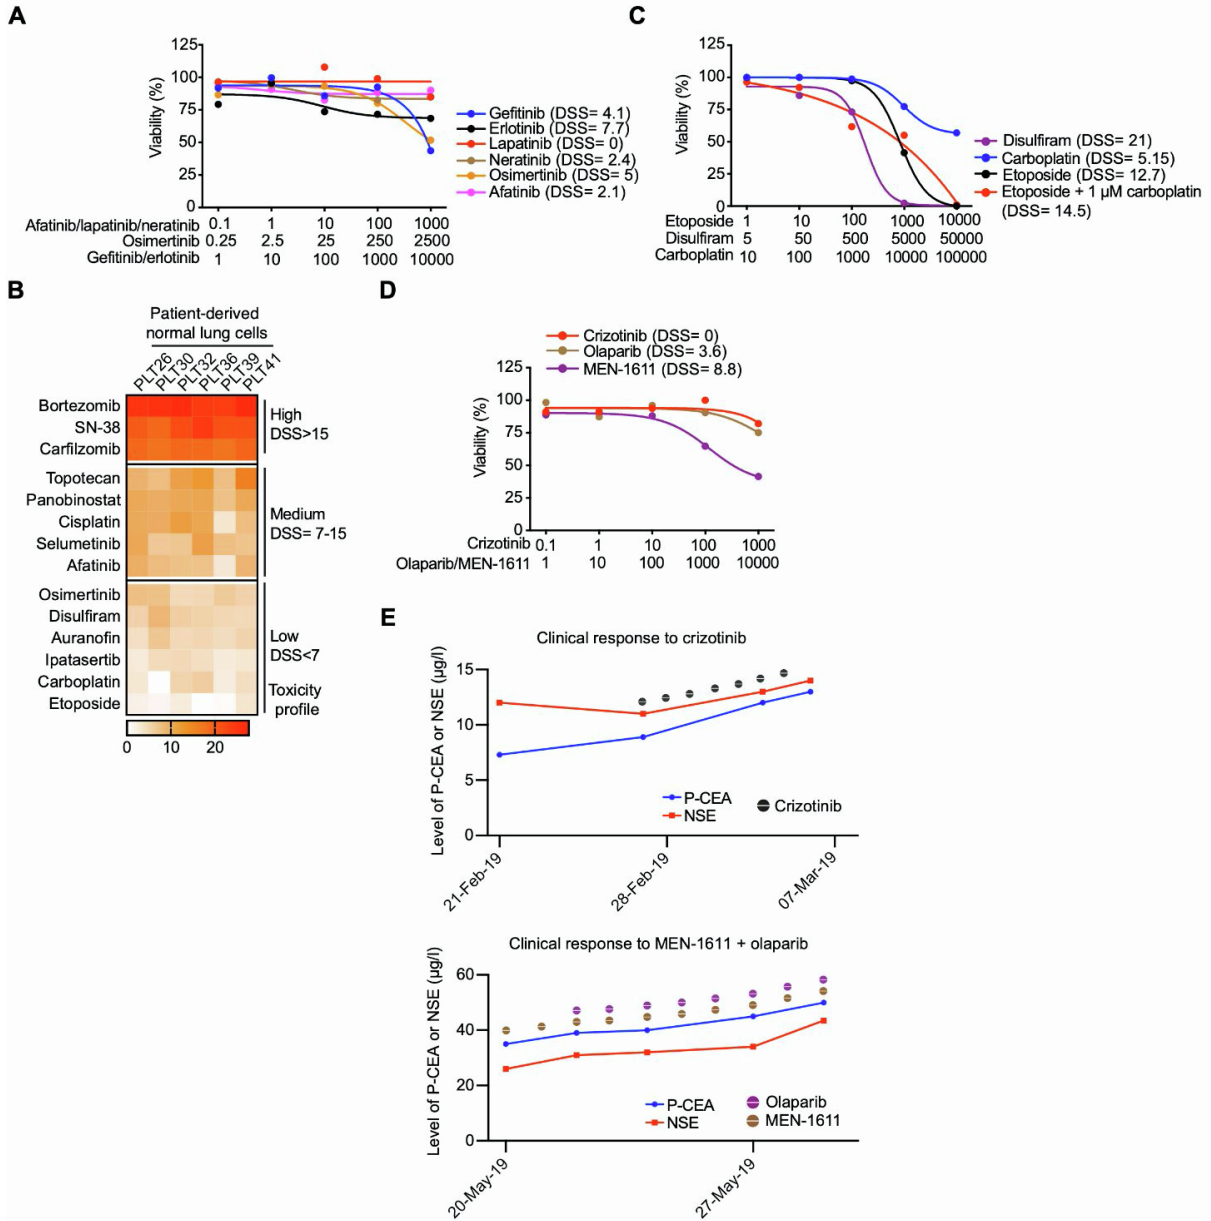

88

89 **Figure S5. FUTC-based drug profiling identifies patient-selective drug sensitivities. Related to Figure 6.**  
 90 (A) Dose-response curves of different EGFR inhibitors in patient-derived FUTCs. (B) Toxicity profiles of top  
 91 hits were assessed by testing their sensitivity in CR cultures established from healthy lung tissue of lung cancer  
 92 patients. Drugs with average DSS >15 or DSS >7 are denoted as highly or mildly toxic, respectively. Drugs with  
 93 average DSS <7 in the control cells were considered as putative lower toxicity compounds for clinical treatment.  
 94 (C) Dose-response curves of patient-derived FUTCs treated with five doses of disulfiram, carboplatin,  
 95 etoposide, and combination treatment. For the combination screen, 1 μM of carboplatin was used together with  
 96 a dose series of etoposide. (D) Dose-response curves of patient-derived FUTCs treated with five doses of  
 97 crizotinib, olaparib, and MEN-1611. (E) Changes in the level of CEA and NSE after treatment with crizotinib  
 98 and MEN-1611 plus olaparib treatments.

99

100



**FIGURE S6**

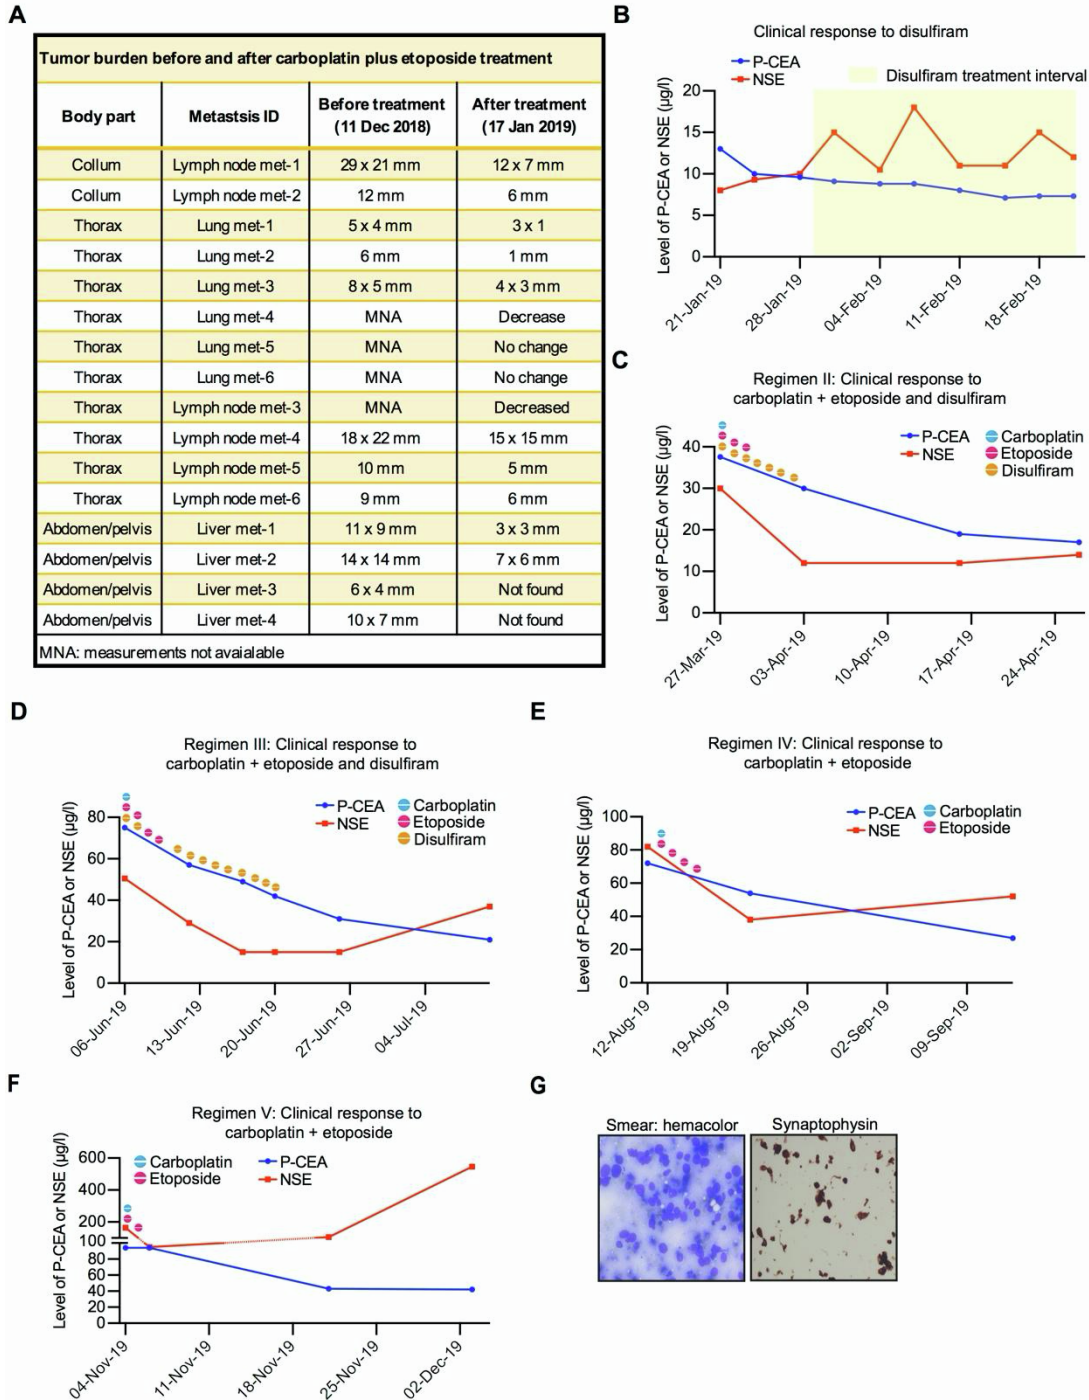

101

102 **Figure S6. Clinical response to carboplatin plus etoposide treatments. Related to Figure 6.** (A) Effect of  
 103 disulfiram and carboplatin plus etoposide treatment on size of metastatic lesions in lymph nodes, lung, and liver.  
 104 (B) Changes in the level of CEA and NSE after disulfiram treatments. (C-F) Changes in the level of CEA and  
 105 NSE after carboplatin plus etoposide treatments with or without disulfiram. (G) Hemacolor stained (left) and  
 106 synaptophysin (right) stains of cell smear obtained from a fine needle aspiration from a lymph node biopsy  
 107 (collected in Jan 2020).

108

109

110

111 **Table S1**

**Table S1 Clinical information of samples used for FUTC-based drug testing. Related to Figure 3.**

| Sample ID | Gender/age | Lung cancer | TNM stage                      | Oncogenic driver              | Treatment                           | Smoking history | Tumor location   |
|-----------|------------|-------------|--------------------------------|-------------------------------|-------------------------------------|-----------------|------------------|
| PLT37     | F/73       | SCC         | T1bN0M0                        | nd                            | surgery                             | 2               | Left lower lobe  |
| PLT38     | M/57       | AC          | T3N1M0                         | uod                           | surgery                             | 0               | Left upper lobe  |
| PLT39     | M/66       | MAC         | results not available          | uod                           | surgery                             | 0               | Right upper lobe |
| PLT41     | M/56       | AC          | solitary recurr in mediastinum | ALK fusion +                  | surgery                             | 0               | Mediastinum      |
| PLT62     | F/50       | AC          | T2aN1M0                        | KRAS G13D                     | surgery + chemotherapy              | 2               | Right lower lobe |
| PLT63     | F/68       | AC          | T3N0M0                         | ALK fusion +                  | surgery                             | 1               | Left upper lobe  |
| PLT64     | F/25       | AC          | T2aN1M0                        | ALK fusion +                  | surgery + chemotherapy              | 0               | Left lower lobe  |
| PLT66     | M/71       | AC          | T3N0M0                         | KRAS G12C                     | surgery                             | 2               | Right lower lobe |
| PLT68     | F/68       | AC          | T1cN0M0                        | KRAS G12S                     | surgery                             | 1               | Right lower lobe |
| PLT70     | M/82       | AC          | T1cN0M0                        | MET exon 14 skipping mutation | surgery                             | 0               | Right upper lobe |
| PLT71     | F/58       | AC          | T2N0M0                         | KRAS G12V                     | surgery                             | 2               | Right lower lobe |
| PLT72     | M/70       | AC          | T2bN0M0                        | EGFR L858R                    | surgery                             | 1               | Right upper lobe |
| PLT84     | M/60       | AC          | T2N2M0                         | EGFR exon 19 del              | surgery + adjuv. chemotherapy       | 0               | Right upper lobe |
| PLT85     | F/76       | AC          | T2aN0M0                        | EGFR L858R                    | surgery                             | 0               | Right upper lobe |
| PLT86     | F/68       | AC          | T2N0M0                         | KRAS G12V                     | surgery + adjuv. chemotherapy       | 0               | Right upper lobe |
| PLT87     | F/61       | AC          | T3N0M0                         | KRAS G12C                     | surgery                             | 2               | Right lower lobe |
| PLT88     | F/43       | ASC         | T2bN1M0                        | EGFR exon 19 del and EGFR amp | surgery + postop. chemoradiotherapy | 0               | Right upper lobe |

SCC: squamous cell carcinoma, AC: adenocarcinoma, MAC: mucinous adenocarcinoma, ASC: adenosquamous carcinoma, nd: not done, uod: unknown oncogenic driver, never smoker: 0, ex-smoker: 1, current smoker: 2

112

113

114

115

116

117

118

119

120

121

122

123

124

125

126

127

128

129

130

131

132

133

134

135 **Table S2**

**Table S2 Immunohistochemical and phenotypic characterization of clinical lung tumor tissues. Related to Figure 3, Figure 4 and Figure 5.**

| Sample ID      | Lung cancer type | Tumor epithelial region (%) | EpCAM+ cells normalized to total cancer cells (%): strong positivity | EpCAM+ cells normalized to total cancer cells (%): weak positivity | Ki-67+ cells normalized to total cancer cells (%) | p4EBP1+ cells normalized to total cancer cells (%) | pERK+ cells normalized to total cancer cells (%) | pERK and p4EBP1 double positive cells normalized to total cancer | pEGFR positive cancer cells | pERBB2 positive cancer cells | pERBB3 positive cancer cells | E-cadherin and vimentin double positive cells |
|----------------|------------------|-----------------------------|----------------------------------------------------------------------|--------------------------------------------------------------------|---------------------------------------------------|----------------------------------------------------|--------------------------------------------------|------------------------------------------------------------------|-----------------------------|------------------------------|------------------------------|-----------------------------------------------|
| PLT37          | SCC              | 28.15                       | 26.35                                                                | 73.65                                                              | 39.82                                             | 10.25                                              | 0.00                                             | 0.00                                                             | -                           | -                            | -                            | -                                             |
| PLT38          | AC               | 14.3                        | 46.85                                                                | 53.15                                                              | 39.32                                             | 13.58                                              | 1.47                                             | 1.03                                                             | -                           | -                            | -                            | -                                             |
| PLT39          | MAC              | 4.754                       | 29.79                                                                | 70.21                                                              | 15.85                                             | 1.46                                               | 3.42                                             | 0.09                                                             | -                           | -                            | -                            | -                                             |
| PLT41          | AC               | 46.56                       | 6.71                                                                 | 93.29                                                              | 10.85                                             | 0.33                                               | 0.00                                             | 0.00                                                             | nd                          | nd                           | nd                           | +                                             |
| PLT62; region1 | AC               | 42.33                       | 77.29                                                                | 22.71                                                              | 29.91                                             | 33.31                                              | 12.21                                            | 5.10                                                             | +                           | -                            | -                            | -                                             |
| PLT62; region2 | AC               | 49.69                       | 90.23                                                                | 7.77                                                               | 32.31                                             | 28.69                                              | 0.00                                             | 0.00                                                             | +                           | -                            | -                            | -                                             |
| PLT63          | AC               | 21.8                        | 18.05                                                                | 81.95                                                              | 9.77                                              | 9.30                                               | 5.91                                             | 0.65                                                             | -                           | -                            | -                            | +                                             |
| PLT64          | AC               | 47.3                        | 2.795                                                                | 97.205                                                             | 16.26                                             | 3.51                                               | 0.00                                             | 0.00                                                             | -                           | -                            | -                            | +                                             |
| PLT66          | AC               | 16.68                       | 54.6                                                                 | 45.4                                                               | 23.71                                             | 1.19                                               | 47.56                                            | 0.47                                                             | -                           | -                            | -                            | -                                             |
| PLT68          | AC               | 38.07                       | 63.61                                                                | 36.39                                                              | 24.69                                             | 0.09                                               | 27.13                                            | 0.01                                                             | -                           | -                            | -                            | -                                             |
| PLT70          | AC               | 21.14                       | 32.53                                                                | 67.47                                                              | 4.28                                              | 0.30                                               | 0.00                                             | 0.00                                                             | -                           | -                            | -                            | -                                             |
| PLT71          | AC               | 10.84                       | 29.43                                                                | 70.57                                                              | 49.58                                             | 2.47                                               | 7.17                                             | 0.18                                                             | +                           | -                            | -                            | -                                             |
| PLT72          | AC               | 22.51                       | 1.67                                                                 | 98.33                                                              | 11.11                                             | 3.46                                               | 0.00                                             | 0.88                                                             | -                           | -                            | -                            | +                                             |
| PLT84          | AC               | 17.73                       | 19.97                                                                | 80.03                                                              | 5.82                                              | 13.85                                              | 42.23                                            | 6.32                                                             | +                           | +                            | +                            | +                                             |
| PLT85          | AC               | 2.574                       | 45.09                                                                | 54.01                                                              | 4.39                                              | 13.96                                              | 69.05                                            | 7.79                                                             | +                           | +                            | +                            | -                                             |
| PLT86          | AC               | 12.99                       | 70.57                                                                | 29.43                                                              | 17.45                                             | 45.18                                              | 71.58                                            | 6.46                                                             | -                           | -                            | -                            | -                                             |
| PLT87          | AC               | 61.15                       | 86.99                                                                | 13.01                                                              | 65.42                                             | 7.44                                               | 23.24                                            | 2.41                                                             | +                           | +                            | -                            | -                                             |
| PLT88          | ASC              | 22.55                       | 6.39                                                                 | 93.61                                                              | 27.94                                             | 0.08                                               | 0.00                                             | 0.00                                                             | +                           | +                            | +                            | +                                             |
| PLT 96         | AC               | 12.39                       | 30.64                                                                | 69.36                                                              | 10.89                                             | nd                                                 | nd                                               | nd                                                               | nd                          | nd                           | nd                           | nd                                            |

SCC: squamous cell carcinoma, AC: adenocarcinoma, MAC: mucinous adenocarcinoma, ASC: adenosquamous carcinoma, + : present, - : absent, nd: not done

136

137

138

139

140

141

142

143

144

145

146

147

148

149

150

151

152

153

154

155

156

157

Table S3 DSS comparison between KRAS mutant cells and KRAS wildtype cells for 66 oncology drugs . Related to Figure 5.

| KRAS-selective hit ID | Drug Name     | Mean Diff | Median Diff | p.val | adjusted Pval | t.test | t.adjust |
|-----------------------|---------------|-----------|-------------|-------|---------------|--------|----------|
| 1                     | Trametinib    | 8.060     | 7.850       | 0.004 | 0.262         | 0.001  | 0.072    |
| 2                     | Panobinostat  | 4.633     | 1.350       | 0.268 | 0.937         | 0.245  | 0.737    |
| 3                     | LY3009120     | 4.227     | 2.600       | 0.149 | 0.937         | 0.114  | 0.737    |
| 4                     | Ganetespib    | 3.884     | 2.300       | 0.745 | 0.958         | 0.424  | 0.737    |
| 5                     | Cobimetinib   | 3.103     | 0.100       | 0.329 | 0.937         | 0.199  | 0.737    |
| 6                     | Ulixertinib   | 2.573     | 4.400       | 0.191 | 0.937         | 0.370  | 0.737    |
| 7                     | Sorafenib     | 2.083     | 0.000       | 0.353 | 0.937         | 0.280  | 0.737    |
| 8                     | Ravoxertinib  | 1.577     | 1.500       | 0.254 | 0.937         | 0.349  | 0.737    |
| 9                     | Olaparib      | 1.504     | 1.400       | 0.074 | 0.809         | 0.188  | 0.737    |
| 10                    | Gandotinib    | 1.366     | 3.000       | 0.415 | 0.937         | 0.376  | 0.737    |
| 11                    | Prexasertib   | 1.340     | 2.850       | 1.000 | 1.000         | 0.771  | 0.950    |
| 12                    | Nintedanib    | 1.217     | 1.750       | 0.432 | 0.937         | 0.610  | 0.895    |
| 13                    | Afatinib      | 1.005     | 5.900       | 0.356 | 0.937         | 0.673  | 0.907    |
| 14                    | Tipifarnib    | 0.996     | 1.150       | 0.745 | 0.958         | 0.652  | 0.906    |
| 15                    | LCL161        | 0.963     | 3.600       | 0.569 | 0.937         | 0.801  | 0.950    |
| 16                    | Vorinostat    | 0.821     | 0.700       | 0.876 | 1.000         | 0.761  | 0.950    |
| 17                    | Vismodegib    | 0.707     | 0.950       | 0.501 | 0.937         | 0.727  | 0.941    |
| 18                    | Gedatolisib   | 0.683     | 1.900       | 0.755 | 0.958         | 0.837  | 0.950    |
| 19                    | BMS-754807    | 0.669     | 0.050       | 0.935 | 1.000         | 0.848  | 0.950    |
| 20                    | JQ1           | 0.363     | -1.300      | 1.000 | 1.000         | 0.914  | 0.955    |
| 21                    | Vemurafenib   | 0.057     | -1.200      | 1.000 | 1.000         | 0.982  | 0.982    |
| 22                    | Dabrafenib    | -0.151    | 0.700       | 0.563 | 0.937         | 0.926  | 0.955    |
| 23                    | Doxorubicin   | -0.244    | 3.000       | 0.639 | 0.937         | 0.946  | 0.961    |
| 24                    | AZD4547       | -0.257    | 0.400       | 1.000 | 1.000         | 0.860  | 0.950    |
| 25                    | Carboplatin   | -0.297    | -0.100      | 1.000 | 1.000         | 0.856  | 0.950    |
| 26                    | Dasatinib     | -0.314    | -0.050      | 1.000 | 1.000         | 0.896  | 0.955    |
| 27                    | Roxadustat    | -0.324    | -0.200      | 1.000 | 1.000         | 0.864  | 0.950    |
| 28                    | Vistusertib   | -0.417    | -2.000      | 1.000 | 1.000         | 0.912  | 0.955    |
| 29                    | Chloroquine   | -0.500    | -1.550      | 1.000 | 1.000         | 0.808  | 0.950    |
| 30                    | PAC-1         | -0.531    | -0.400      | 0.807 | 0.987         | 0.659  | 0.906    |
| 31                    | TAK-715       | -0.796    | -2.150      | 0.508 | 0.937         | 0.574  | 0.876    |
| 32                    | Sonidegib     | -0.881    | 0.000       | 0.440 | 0.937         | 0.315  | 0.737    |
| 33                    | Perifosine    | -0.884    | -0.750      | 0.456 | 0.937         | 0.296  | 0.737    |
| 34                    | Alpelisib     | -0.920    | -1.200      | 0.394 | 0.937         | 0.391  | 0.737    |
| 35                    | Metformin     | -0.923    | -0.500      | 0.238 | 0.937         | 0.183  | 0.737    |
| 36                    | Foretinib     | -1.003    | -1.450      | 0.608 | 0.937         | 0.447  | 0.737    |
| 37                    | Docetaxel     | -1.027    | 1.550       | 0.684 | 0.958         | 0.647  | 0.906    |
| 38                    | KU-60019      | -1.030    | -0.100      | 0.522 | 0.937         | 0.284  | 0.737    |
| 39                    | Volasertib    | -1.126    | -1.100      | 0.102 | 0.937         | 0.062  | 0.737    |
| 40                    | Cabozantinib  | -1.130    | 0.600       | 0.934 | 1.000         | 0.416  | 0.737    |
| 41                    | Ipatasertib   | -1.176    | -2.600      | 0.755 | 0.958         | 0.704  | 0.929    |
| 42                    | Ponatinib     | -1.287    | -0.475      | 0.628 | 0.937         | 0.444  | 0.737    |
| 43                    | Palbociclib   | -1.303    | -1.300      | 0.515 | 0.937         | 0.472  | 0.760    |
| 44                    | Veliparib     | -1.320    | -0.700      | 0.463 | 0.937         | 0.264  | 0.737    |
| 45                    | Osimertinib   | -1.428    | -0.950      | 0.518 | 0.937         | 0.446  | 0.737    |
| 46                    | Dexamethasone | -1.487    | 0.000       | 0.717 | 0.958         | 0.370  | 0.737    |
| 47                    | Birabresib    | -1.664    | -2.000      | 0.639 | 0.937         | 0.584  | 0.876    |
| 48                    | Gefitinib     | -1.677    | 1.300       | 0.792 | 0.987         | 0.389  | 0.737    |
| 49                    | Dovitinib     | -1.711    | -0.200      | 0.741 | 0.958         | 0.389  | 0.737    |
| 50                    | Lapatinib     | -1.743    | -0.100      | 0.066 | 0.809         | 0.250  | 0.737    |
| 51                    | NVP-LGK974    | -1.813    | -1.550      | 0.623 | 0.937         | 0.217  | 0.737    |
| 52                    | Gemcitabine   | -1.888    | -2.275      | 0.429 | 0.937         | 0.186  | 0.737    |
| 53                    | Crizotinib    | -1.902    | -2.700      | 0.136 | 0.937         | 0.069  | 0.737    |
| 54                    | Ralimetinib   | -1.971    | -1.550      | 0.515 | 0.937         | 0.255  | 0.737    |
| 55                    | VE-821        | -2.069    | -1.400      | 0.260 | 0.937         | 0.070  | 0.737    |
| 56                    | Ruxolitinib   | -2.171    | -1.100      | 0.624 | 0.937         | 0.330  | 0.737    |
| 57                    | Ceritinib     | -2.492    | -1.725      | 0.228 | 0.937         | 0.201  | 0.737    |
| 58                    | Pomalidomide  | -2.869    | -2.000      | 0.116 | 0.937         | 0.182  | 0.737    |
| 59                    | Vincristine   | -2.994    | -1.700      | 0.326 | 0.937         | 0.155  | 0.737    |
| 60                    | Azacitidine   | -3.344    | -3.650      | 0.073 | 0.809         | 0.069  | 0.737    |
| 61                    | Navitoclax    | -3.365    | -5.325      | 0.628 | 0.937         | 0.486  | 0.764    |
| 62                    | Dinaciclib    | -3.503    | -7.100      | 0.432 | 0.937         | 0.438  | 0.737    |
| 63                    | Everolimus    | -3.991    | -4.000      | 0.074 | 0.809         | 0.061  | 0.737    |
| 64                    | Pictilisib    | -4.691    | 0.000       | 0.569 | 0.937         | 0.155  | 0.737    |
| 65                    | Idasanutlin   | -4.938    | -7.300      | 0.202 | 0.937         | 0.082  | 0.737    |
| 66                    | Cisplatin     | -5.811    | -1.300      | 0.074 | 0.809         | 0.117  | 0.737    |

160 **References**

- 161 1. Talwelkar SS, Nagaraj AS, Devlin JR, Hemmes A, Potdar S, Kiss EA, et al. Receptor  
162 Tyrosine Kinase Signaling Networks Define Sensitivity to ERBB Inhibition and  
163 Stratify Kras-Mutant Lung Cancers. *Molecular cancer therapeutics*. 2019;18(10):1863-  
164 74.
- 165 2. Potdar S, Ianevski A, Mpindi JP, Bychkov D, Fiere C, Ianevski P, et al. Breeze: an  
166 integrated quality control and data analysis application for high-throughput drug  
167 screening. *Bioinformatics*. 2020.
- 168 3. Yadav B, Pemovska T, Szwajda A, Kuleskiy E, Kontro M, Karjalainen R, et al.  
169 Quantitative scoring of differential drug sensitivity for individually optimized  
170 anticancer therapies. *Sci Rep*. 2014;4:5193.
- 171 4. Dufva O, Kankainen M, Kelkka T, Sekiguchi N, Awad SA, Eldfors S, et al. Aggressive  
172 natural killer-cell leukemia mutational landscape and drug profiling highlight JAK-  
173 STAT signaling as therapeutic target. *Nat Commun*. 2018;9(1):1567.
- 174 5. Bao J, Walliander M, Kovacs F, Nagaraj AS, Hemmes A, Sarhadi VK, et al. Spa-RQ:  
175 an Image Analysis Tool to Visualise and Quantify Spatial Phenotypes Applied to Non-  
176 Small Cell Lung Cancer. *Sci Rep*. 2019;9(1):17613.
- 177
